# Supplementary material for: Mapping the metabolic characteristics of probiotic-fermentedGanoderma lucidumand its protective mechanism against Cd-induced nephrotoxicity
Source: Royal Society of Chemistry journal article supplement (doi:10.1039/d3fo01587d), 2023-01-01
Supplement: d3fo01587d2.pdf [file d3fo01587d2.pdf]

Table S1 The histopathology scoring criteria

| <b>Pathological</b>                             | <b>Classification</b> | <b>Describe</b>                                                                                                 | <b>Score</b> |
|-------------------------------------------------|-----------------------|-----------------------------------------------------------------------------------------------------------------|--------------|
| Tubulointerstitial<br>and glomerular<br>lesions | No damage             | No glomerular injury, no interstitial infiltration                                                              | 0            |
|                                                 | Mild                  | Mild expansion of the glomerular and mild renal tubular injury<br>(involvement of less than 10% of the cortex)  | 1            |
|                                                 | Moderate              | Moderate glomerulonephritis with extensive sclerosis and cell necrosis<br>(involvement of 10-25% of the cortex) | 2            |
|                                                 | Severe                | Severe glomerulonephritis with large area of cell necrosis<br>(involvement of 25-50% of the cortex)             | 3            |
|                                                 | Very severe           | Very severe glomerulonephritis (involvement of 50-75% of the cortex)                                            | 4            |
|                                                 | Extensive damage      | Extensive damage of glomerulus and necrosis (involvement of more<br>than 75% of the cortex)                     | 5            |

Table S2 Primer sequence of the target genes for RT-PCR analysis

| <b>Target gene</b>             | <b>forward primer (5' to 3')</b> | <b>reverse primer (5' to 3')</b> |
|--------------------------------|----------------------------------|----------------------------------|
| <i>TNF-<math>\alpha</math></i> | GCTCCCTCTCATCAGTTCCA             | GCTTGGTGGTTTGCTACGAC             |
| <i>Il-<math>\beta</math></i>   | GCCAACAAGTGGTATTCTCCA            | TGCCGTCTTTCATCACACAG             |
| <i>Il-6</i>                    | AGTTGCCTTCTTGGGACTGA             | CAGAATTGCCATTGCACAAC             |
| <i>NF-<math>\kappa</math>B</i> | GAGGCATGTTCGGTAGTGGC             | TGCAATCCCACCGTAAGCAG             |
| <i>S100a9</i>                  | TCAAAGAGCTGGTGCGAAAA             | AACTCCTCGAAGCTCAGCTG             |
| <i>Hk3</i>                     | TGTTGTGTATTTATTACGGGAAGCC        | ACATTCCGGAGTTCTTCCATATAGC        |
| <i>Casp-3</i>                  | GGATTGAGACGGACAGTG               | TTCGCCAGGAATAGTAACC              |
| <i>Bax</i>                     | CAAGAAGCTGAGCGAGTGTCT            | GGTTCTGATCAGCTCGGGCAC            |
| <i>GAPDH</i>                   | AGTGCCAGCCTCGTCTCATA             | GATGGTGATGGGTTTCCCGT             |

Table S3 Metabolic pathways of differential metabolites in FGL-vs-GLS group

| <b>Pathway name</b>                         | <b>Raw p</b> | <b>Impact</b> | <b>UP</b>                                                                   | <b>Down</b>                      |
|---------------------------------------------|--------------|---------------|-----------------------------------------------------------------------------|----------------------------------|
| Galactose metabolism                        | 0.49471      | 0.70379       | Stachyose<br>Galactose 1-phosphate                                          | Raffinose<br>Glucose 1-phosphate |
| Arginine and proline metabolism             | 0.53133      | 0.63238       | Hydroxyproline,<br>Ornithine<br>L-Arginine,<br>L-Glutamic acid<br>L-Proline | 4-Guanidinobutanoate             |
| Valine, leucine and isoleucine biosynthesis | 0.59176      | 0.52466       | L-Valine<br>L-Isoleucine<br>L-Leucine                                       |                                  |

|                                            |         |         |                                                                            |                                                           |
|--------------------------------------------|---------|---------|----------------------------------------------------------------------------|-----------------------------------------------------------|
| Glycine, serine and threonine metabolism   | 0.66826 | 0.40308 | L-Serine, Glycine<br>L-Threonine,<br>L-Homoserine<br>5-Aminolevulinic acid |                                                           |
| Valine, leucine and isoleucine degradation | 0.68725 | 0.37506 | L-Valine<br>L-Isoleucine<br>L-Leucine                                      |                                                           |
| Pentose and glucuronate interconversions   | 0.75517 | 0.28081 | D-Xylitol                                                                  | Glucose 1-phosphate                                       |
| Tyrosine metabolism                        | 0.79814 | 0.22547 | L-Tyrosine                                                                 | 3,4-Dihydroxymandelate<br>3,4-Dihydroxyphenylacetaldehyde |
| Lysine biosynthesis                        | 0.79814 | 0.22547 | L-Homoserine<br>L-Lysine                                                   | Amino adipic acid                                         |

|                                             |         |          |                                                                    |                                            |
|---------------------------------------------|---------|----------|--------------------------------------------------------------------|--------------------------------------------|
| Phenylalanine metabolism                    | 0.80969 | 0.2111   | L-Phenylalanine                                                    |                                            |
| Fructose and mannose metabolism             | 0.90241 | 0.10268  |                                                                    | Sorbitol<br>Mannose 6-phosphate            |
| Amino sugar and nucleotide sugar metabolism | 0.90981 | 0.09453  | Galactose 1-phosphate                                              | Glucose 1-phosphate<br>Mannose 6-phosphate |
| Pentose phosphate pathway                   | 0.91954 | 0.083883 | D-Ribose                                                           | Glucose 1-phosphate                        |
| Starch and sucrose metabolism               | 0.91954 | 0.08388  |                                                                    | D-Maltose<br>Glucose 1-phosphate           |
| Cysteine and methionine metabolism          | 0.9414  | 0.06039  | 5'-Methylthioadenosine<br>L-Serine<br>L-Methionine<br>L-Homoserine |                                            |

|                                                     |         |         |                                |                           |
|-----------------------------------------------------|---------|---------|--------------------------------|---------------------------|
| Alanine, aspartate and glutamate metabolism         | 0.94569 | 0.05584 | L-Glutamine<br>L-Glutamic acid |                           |
| Phenylalanine, tyrosine and tryptophan biosynthesis | 0.96365 | 0.03703 | L-Tyrosine<br>L-Phenylalanine  |                           |
| Pantothenate and CoA biosynthesis                   | 0.97796 | 0.02228 | L-Valine                       |                           |
| Butanoate metabolism                                | 0.98269 | 0.01747 | L-Glutamic acid                |                           |
| Citrate cycle                                       | 0.99162 | 0.00842 | cis-Aconitic acid              |                           |
| Glycolysis or Gluconeogenesis                       | 0.99683 | 0.00317 |                                | Glucose 1-phosphate       |
| Tryptophan metabolism                               | 0.99848 | 0.00153 |                                | 3-Hydroxyanthranilic acid |
| Fatty acid metabolism                               | 0.99881 | 0.00119 |                                | Palmitic acid             |
| Biosynthesis of unsaturated fatty                   | 0.99952 | 0.00048 |                                | Palmitic acid             |

|                         |         |         |  |               |
|-------------------------|---------|---------|--|---------------|
| acids                   |         |         |  | Stearic acid  |
| Fatty acid biosynthesis | 0.99987 | 0.00013 |  | Palmitic acid |

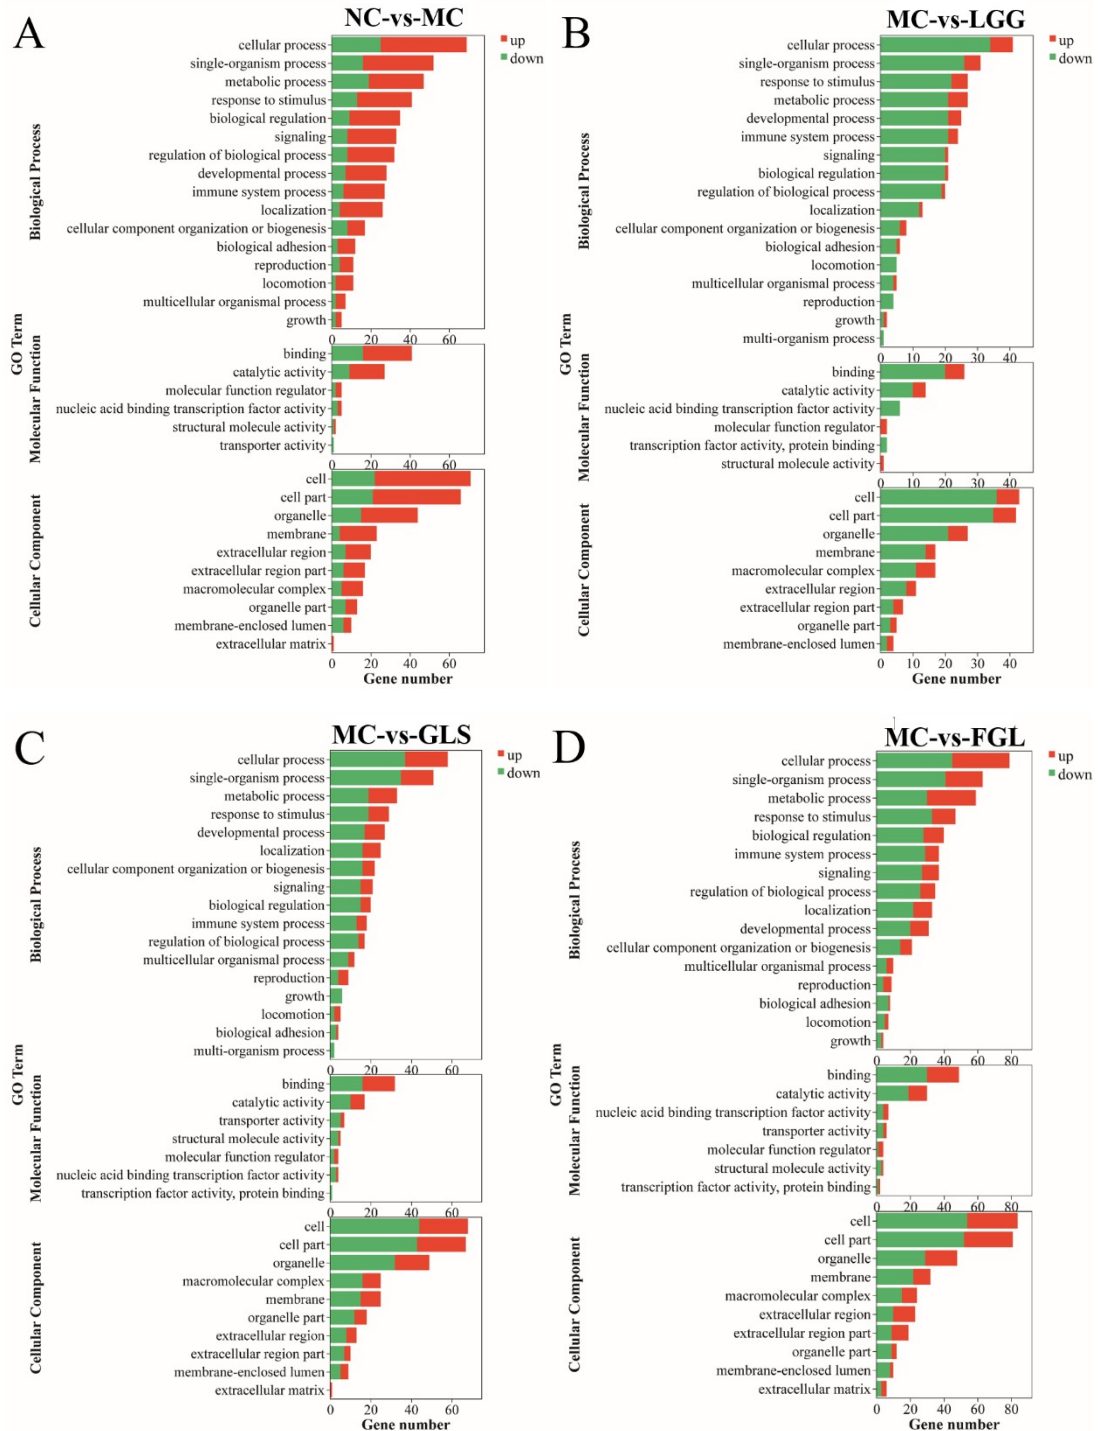

Fig. S1. Gene Ontology analysis of differentially expressed genes in the kidney tissue. (A) NC-vs-MC: normal control group versus model control group; (B) MC-vs-LGG: model control group versus *Lactobacillus rhamnosus* intervention group; (C) MC-vs-GLS: model control group versus ground *Ganoderma lucidum* slice powder mixed with water group; (D) MC-vs-FGL: model control group versus *Lactobacillus*



*rhamnoses*-fermented *G. lucidum* solution.
